# Supplementary material for: Cell-Size-Dependent Transcription of FLC and Its Antisense Long Non-coding RNA COOLAIR Explain Cell-to-Cell Expression Variation
Source: PubMed Central journal article supplement (PMC5493185; doi:10.1016/j.cels.2017.05.010), 2017-06-28

**Cell Systems, Volume 4**

**Supplemental Information**

**Cell-Size-Dependent Transcription of *FLC*  
and Its Antisense Long Non-coding RNA *COOLAIR*  
Explain Cell-to-Cell Expression Variation**

**Robert Ietswaart, Stefanie Rosa, Zhe Wu, Caroline Dean, and Martin Howard**

## Supplemental Information

### Figure legends

**Figure S1.** Related to Figure 2

#### **Characterization of cellular *FLC* expression, mRNA degradation variation and cellular volume**

**(A)** Fluorescence localization of *FLC* DNA as assayed by DNA-FISH, full length *FLC* intron 1 RNA as assayed by smFISH (red), and an overlay containing both the above and DAPI stain (blue) in representative ColFRI outer layer root cells. Scale bar: 5 $\mu$ m. Data previously published in (Rosa et al., 2016).

**(B)** Histogram of pooled cellular *FLC* mRNA distributions after treatment with DMSO (mock) for 4 h and 6 h (N=202 cells from 3 biological replicates).

**(C)** Histogram of cellular *FLC* mRNA counts after 6 h of ActD treatment (blue) and Poisson decay process prediction (red) with distribution of mRNA after 4 h ActD treatment (shown in Fig. 2E) as the initial distribution. Right panel: Cumulative distribution functions (CDFs) of the *FLC* mRNA count and model prediction.

**(D)** Scatter plot comparing two volume estimation methods: 3D segmentation vs projection method in ColFRI outer layer root cells from where *FLC* mRNA counts were recorded (N=209 cells from 8 biological replicates, Fig. 2C). Also shown is line with unit slope (black).

**(E)** Schematic of reactions implemented in stochastic Gillespie simulations of cellular *FLC* mRNA production, with either Poisson or ON/OFF dynamics, and degradation.

**(F)** Histogram of cell volume distribution (N=200 cells from 3 biological replicates) from root outer layer cells from where full length intron 1 foci counts were recorded (Fig. 3B,C). These cell volumes were used as an input into the stochastic simulations described in (E) to account for the variation in cell size affecting *FLC* transcription.

(G) Histograms of cellular mRNA model predictions from stochastic simulations described in (E) given the experimentally observed volume distribution described in (F). ON/OFF simulations had a burst size of 3 transcription events per ON/OFF cycle with either the burst frequency ( $k_{on}$ ) or burst size ( $bs$ ) scaling with cell volume. Right panel: cumulative distribution functions (CDFs) of *FLC* mRNA (from Fig. 2C) and model predictions.

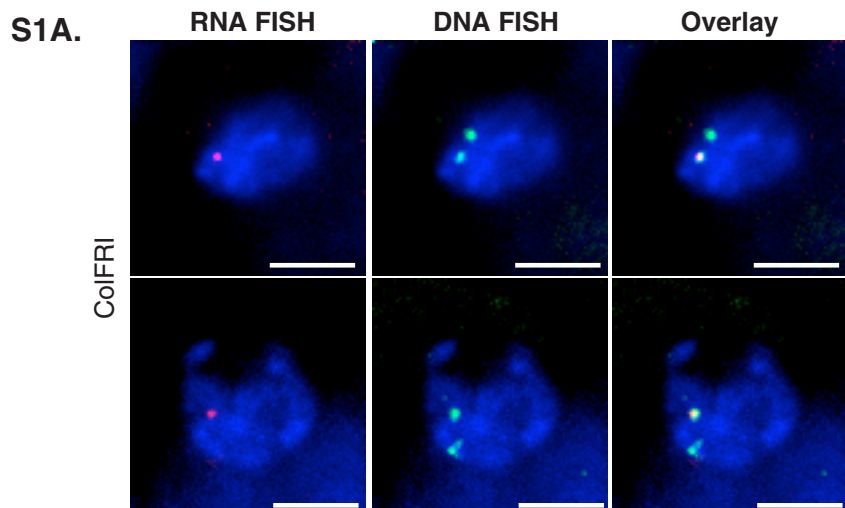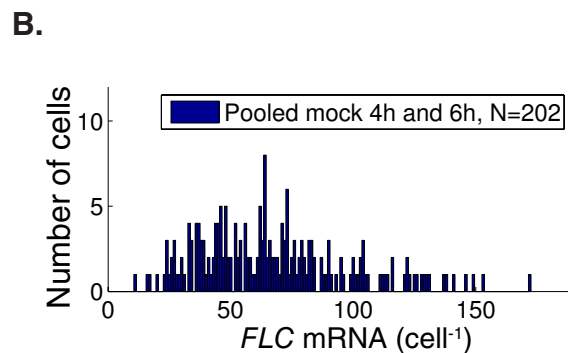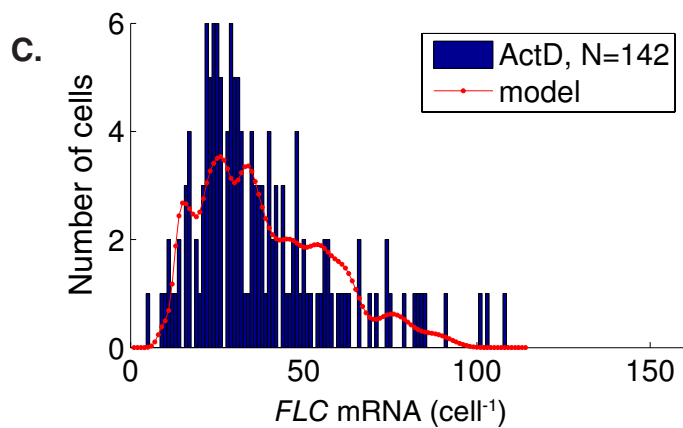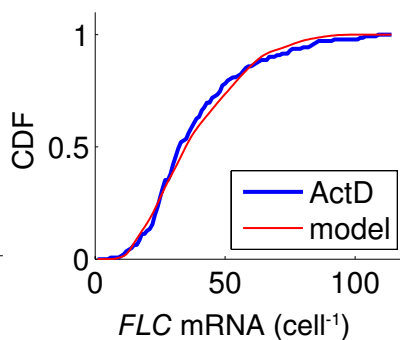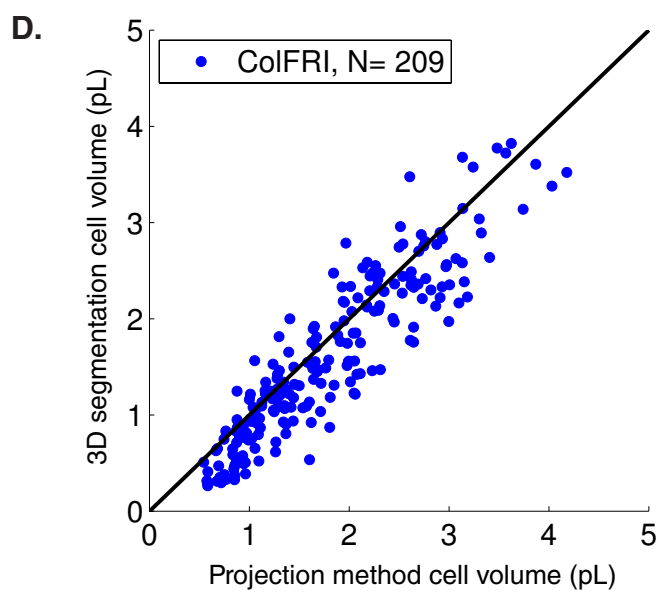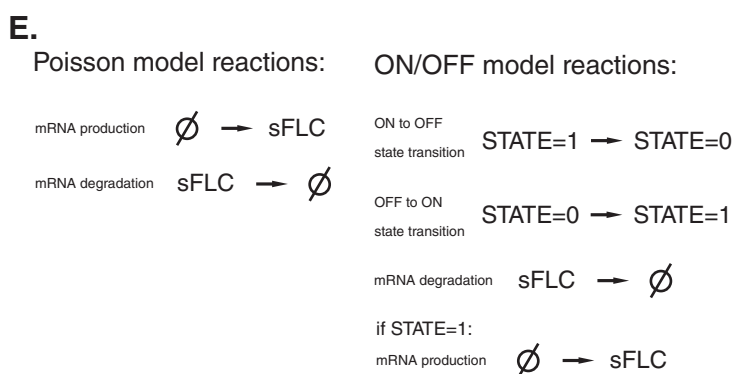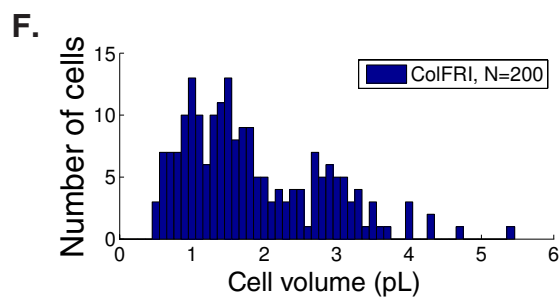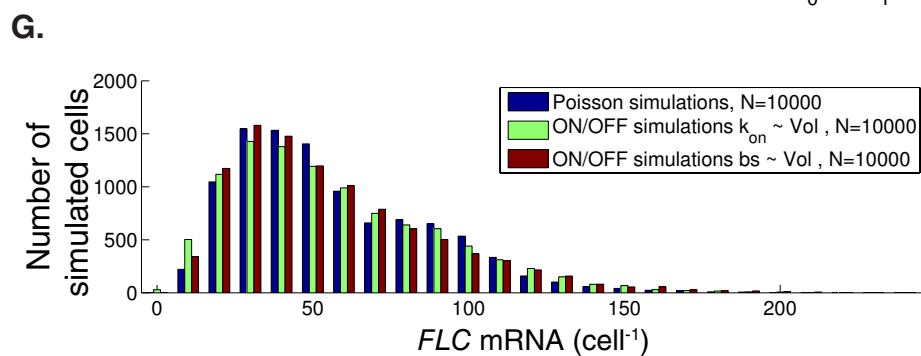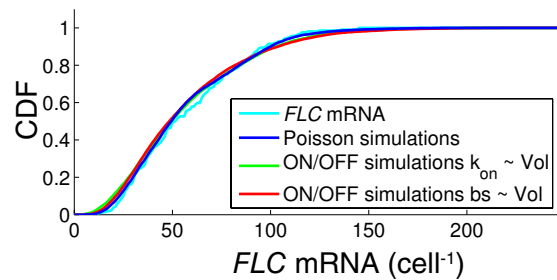

**Figure S2.** Related to Figure 3

**Estimation of Pol II elongation, *FLC* intron 1 processing and lariat degradation rates using a range of missing probe length fractions**

(A) Marginal distributions for intron processing rate that generate good fits to the data shown in Fig. 3C according to a  $\chi^2$  test (degrees of freedom  $k=4$ , acceptance probability  $p \geq 0.1$ ) with missing probe length fractions ranging from 0 to 1/3. Boxplots indicate: minimum, 25% quantile, median, 75% quantile and maximal values.

(B) As in (A) but for elongation rate.

(C) As in (A) but for 5' to 3' lariat degradation rate.

(D) As in (A) but for 3' to 5' lariat degradation rate.

(E) Volume dependence of replicates measuring cellular smFISH foci counts per cell in outer layer cells for four different *FLC* intron 1 probe sets: full length (full), middle (mid), 5' end and 3' end. Full length: two separate experiments were performed using respectively 4 and 3 biological replicates, respectively. Experiment 1: data as in Fig. 2B and 4C, experiment 2: data as in Fig. 3C. For the other probe sets (mid, 5' end and 3' end) replicates are shown as pooled data from two biological replicates each; for these, all biological replicates pooled together are shown in Fig. 3E,F. Error lines: s.e.m. as function of volume.

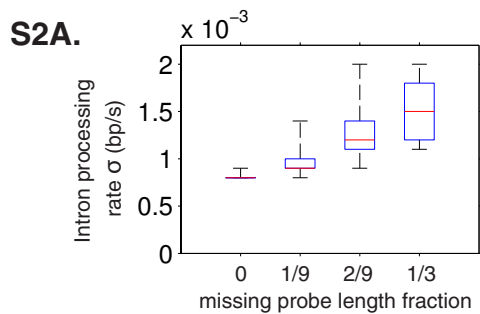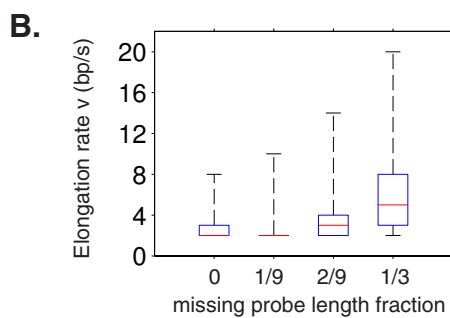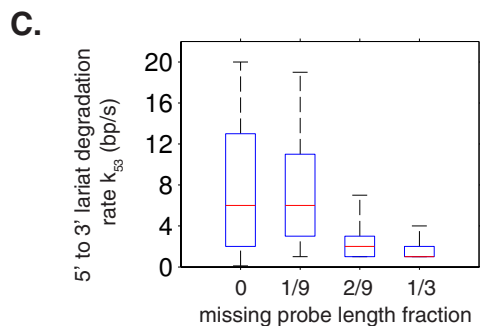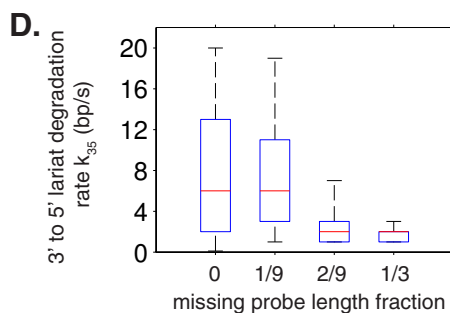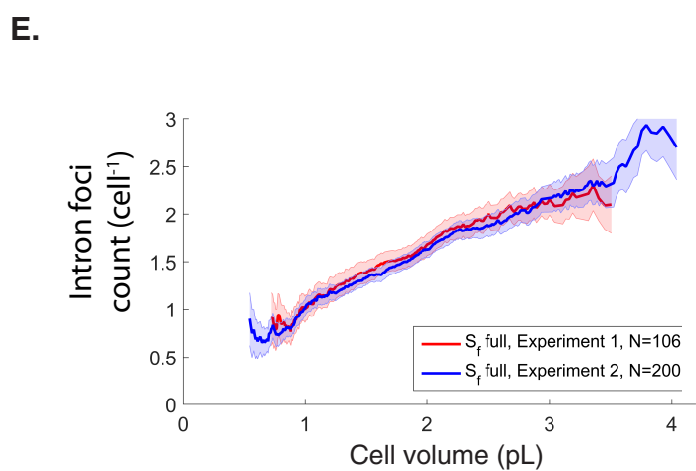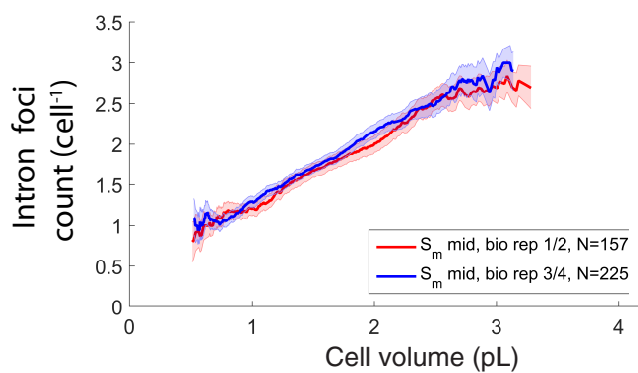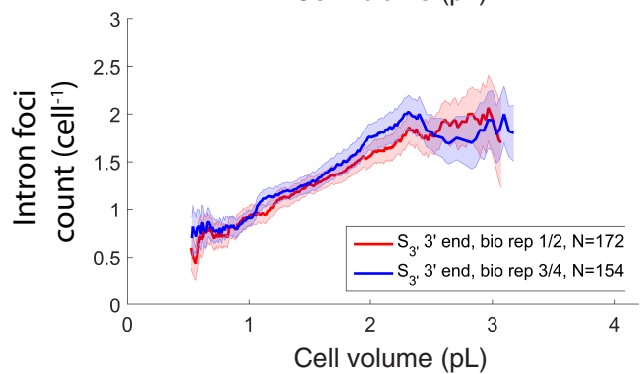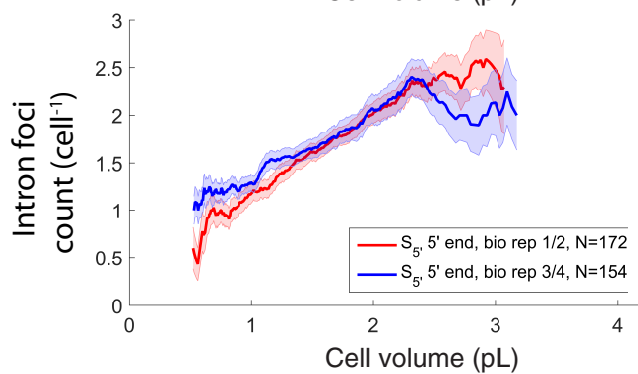

**Figure S3.** Related to Figure 3

**Spatiotemporal Gillespie simulations of *FLC* transcription to quantify *FLC* mRNA release from the locus**

**(A)** Schematic of spatially discretized *FLC* gene and reactions as implemented in spatiotemporal stochastic Gillespie simulations of *FLC* transcription and RNA degradation dynamics. Sense (black) and antisense (grey) transcripts are indicated. Since antisense transcription is very low in root outer layer cells, we did not include antisense transcription in our simulations.

**(B)** Volume dependence of cellular smFISH foci counts per cell in outer layer cells for *FLC* intron 1 as in Fig 3E,F. In left panel: full length (full) and 5' end; in right panel: middle (mid) and 3' end. Also shown are spatiotemporal Gillespie simulation fits (black, grey). Error lines: s.e.m. as function of volume.

**(C)** Volume dependence of average locus associated exonic *FLC* RNA levels from two separate experiments (with 2 biological replicates per experiment). Three different quantification methods shown as in Fig. 3H, which shows the pooled data. Error lines: s.e.m. as a function of volume.

S3A.

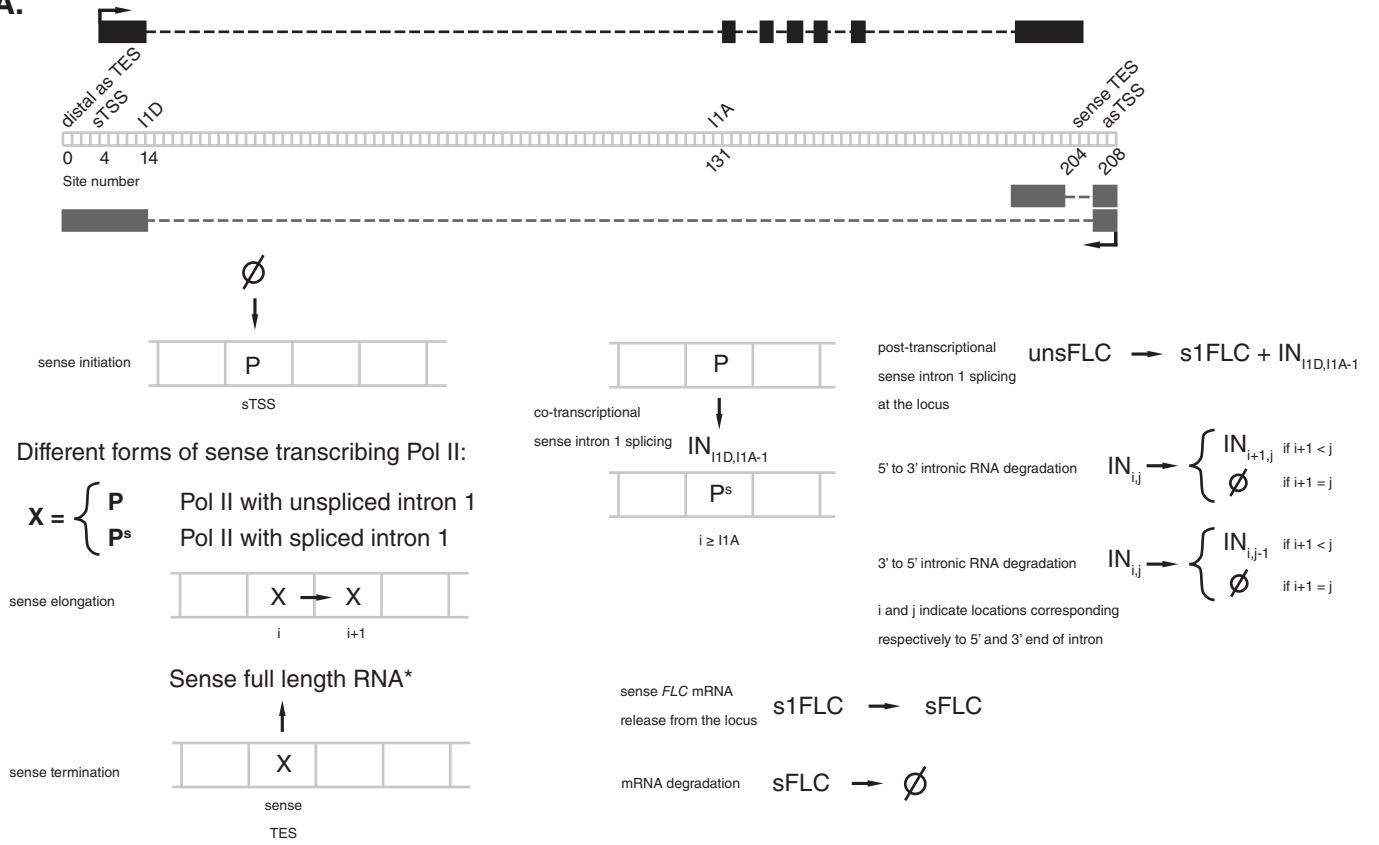

\* sense full length RNA forms:  
unsFLC: unspliced intron 1, resulting from P termination  
s1FLC: intron 1 spliced, resulting from  $P^s$  termination

B.

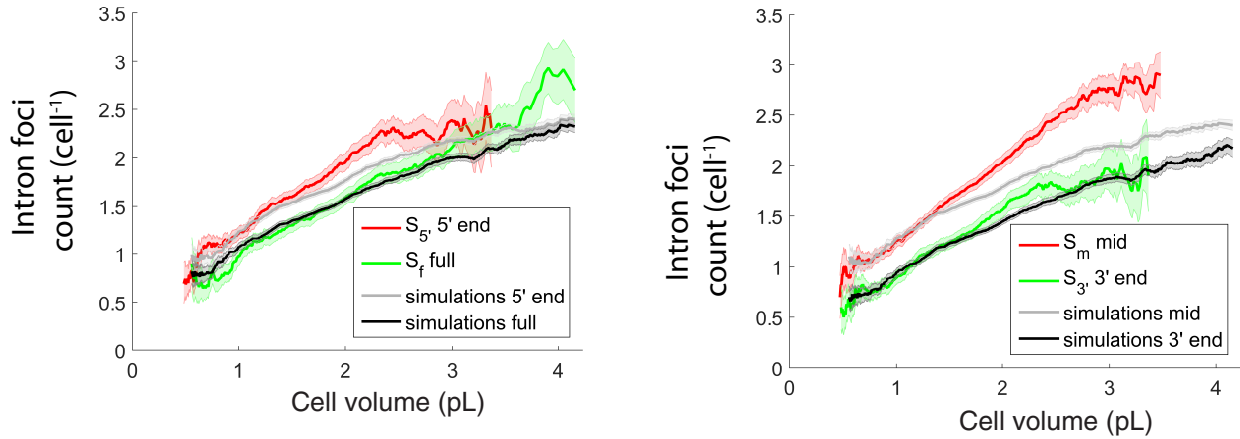

C.

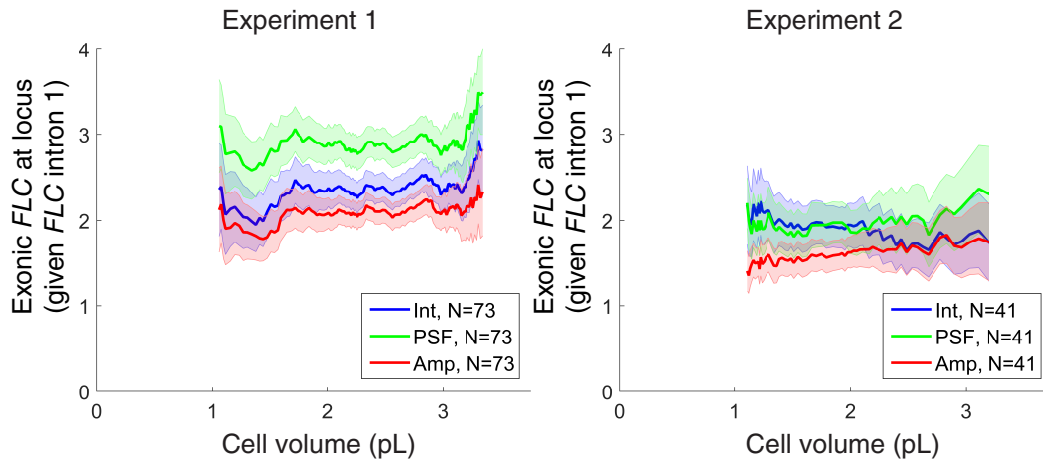



**Figure S4.** Related to Figure 4.

**Characterization of anticorrelation between *FLC* sense and antisense transcription**

**(A)** Fluorescence localization of full length sense intron 1 (red) and antisense (*COOLAIR*) 5' end distal intron (green) overlaid with DAPI stain (blue) in representative ColFRI prevasculature root cell. Scale bar: 5 $\mu$ m. Data previously published in (Rosa et al., 2016).

**(B)** Frequency of loci containing *FLC* full length intron 1, when *COOLAIR* 5' end distal intron is not present (S) or present (S if AS) at the same locus in root prevasculature cells. N=254 cells from 6 biological replicates. Error bars: s.e.m. \*\*\*\* p-value < 10<sup>-4</sup>. Data previously published in (Rosa et al., 2016).

S4A.

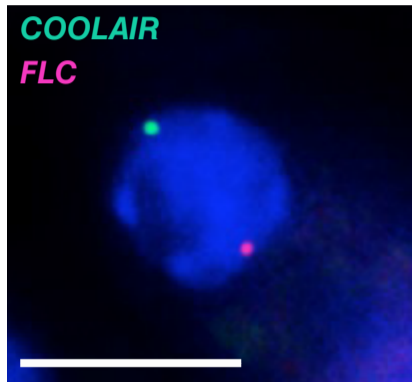

B.

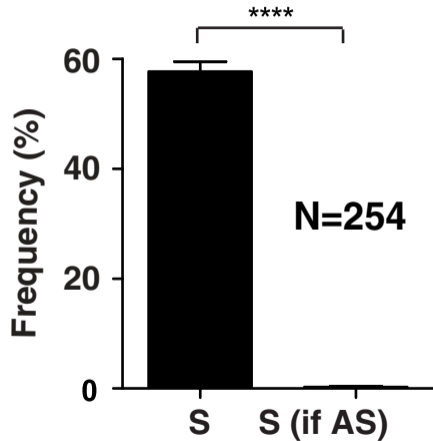

Supplement: mmc1.pdf [file mmc1.pdf]
